# Supplementary material for: Comparative Genomic Analysis of Colletotrichum lini Strains with Different Virulence on Flax
Source: MDPI journal article supplement (doi:10.3390/jof10010032), 2023-12-31

Figure S1. Telomeric repeat (TTAGGG) content along the contig sequences of *Colletotrichum lini* strain #390-1:  
horizontal axis - coordinate, vertical axis - repeat occurrence (frequency)

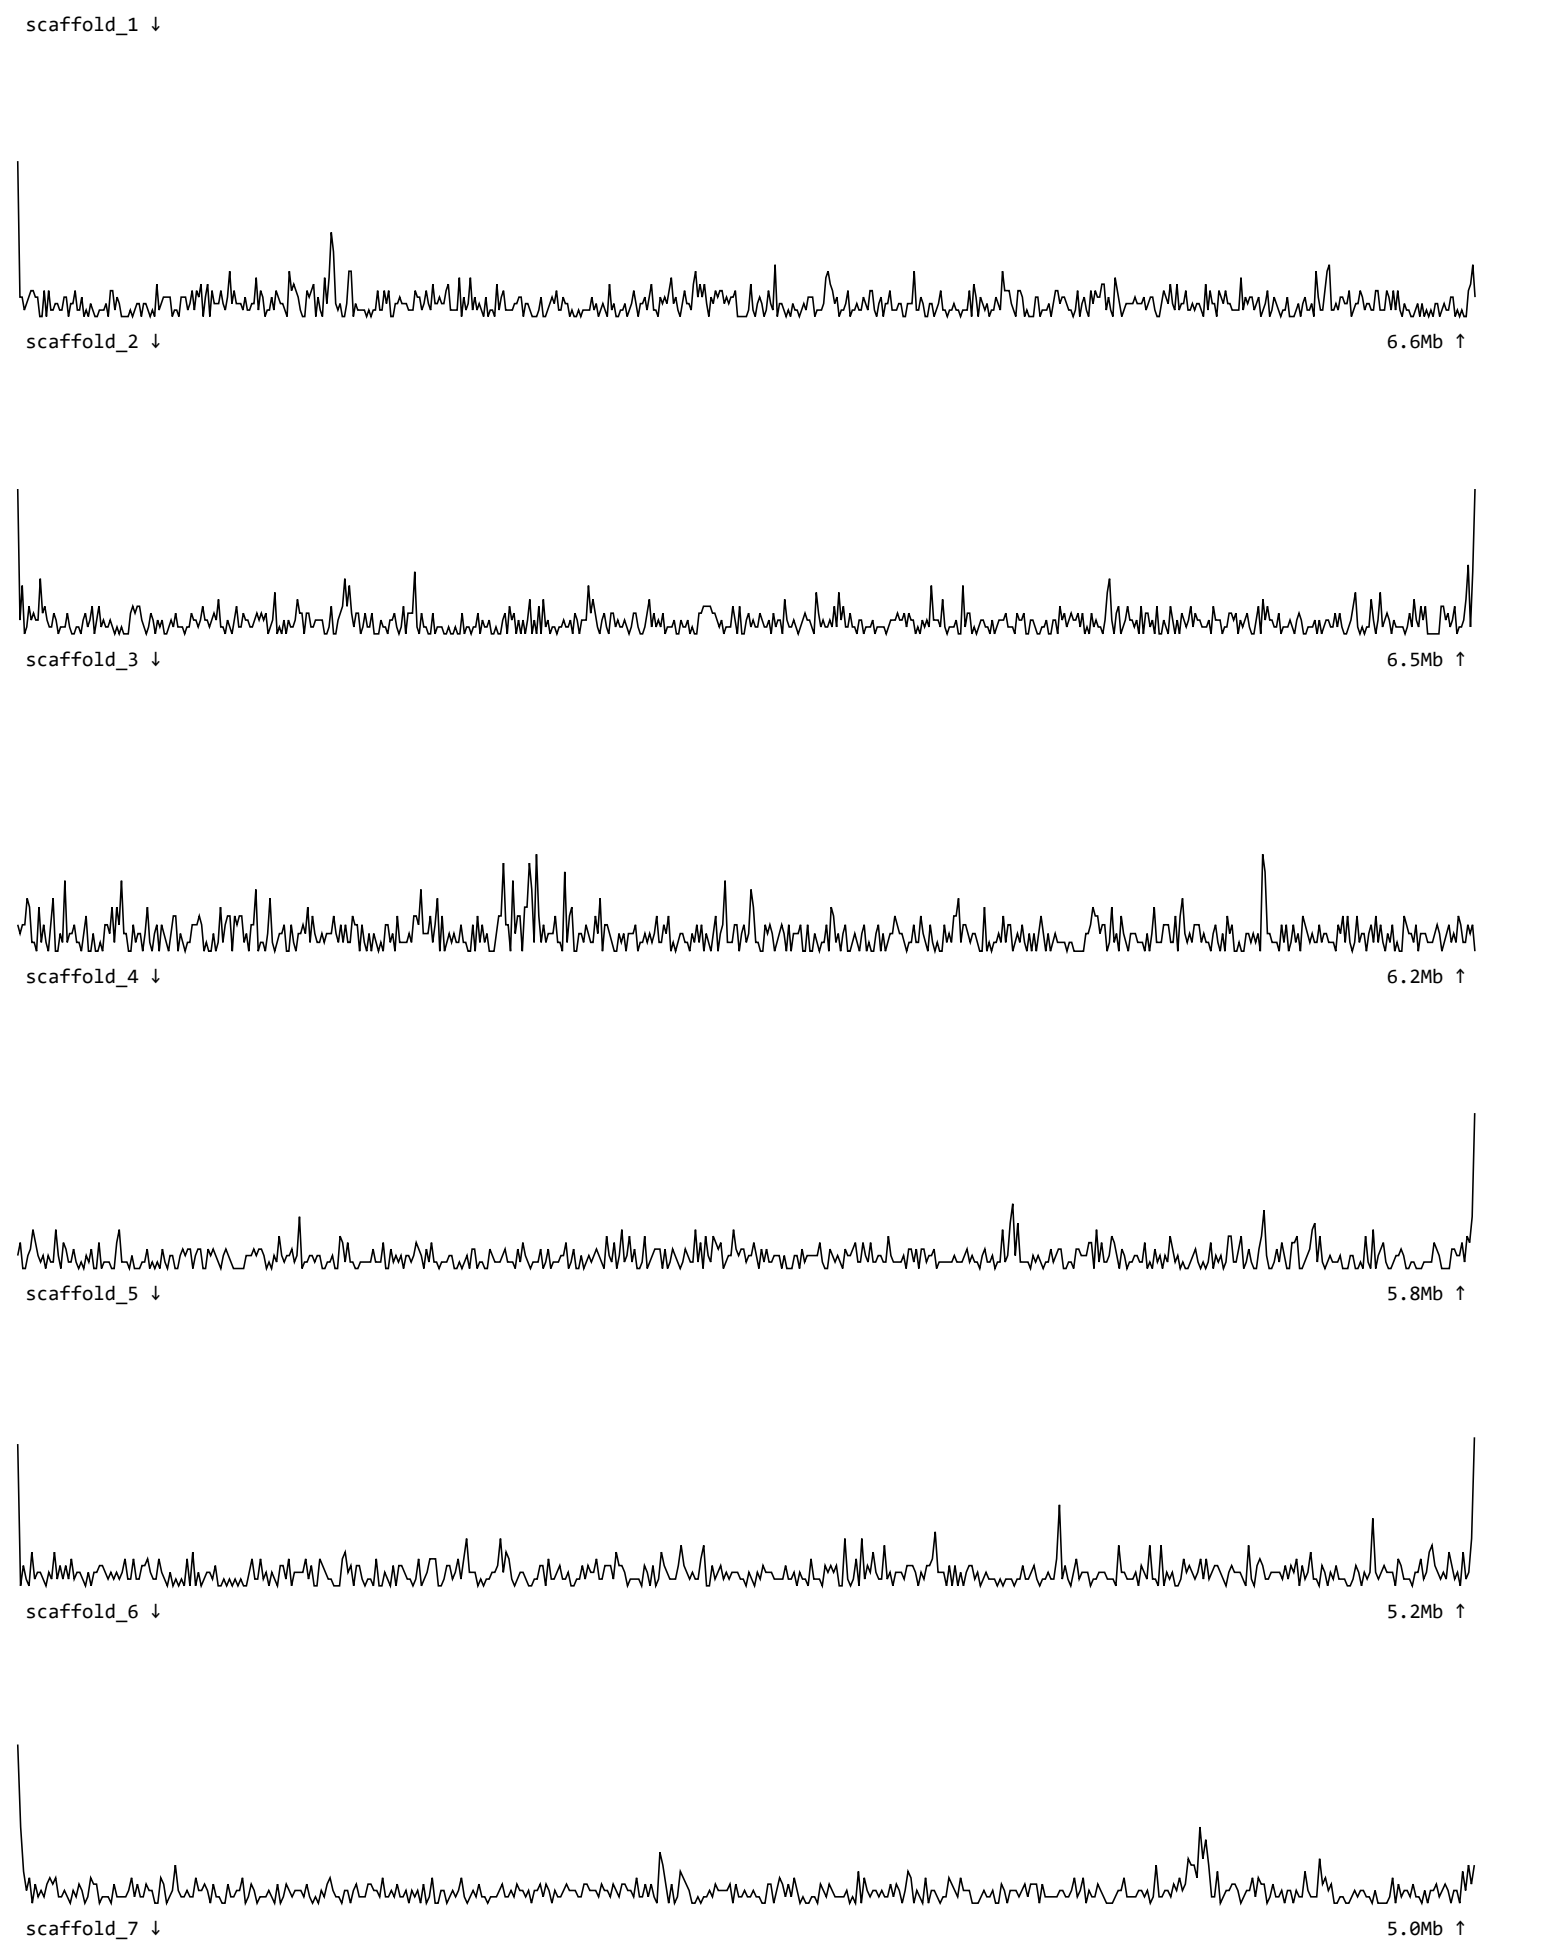

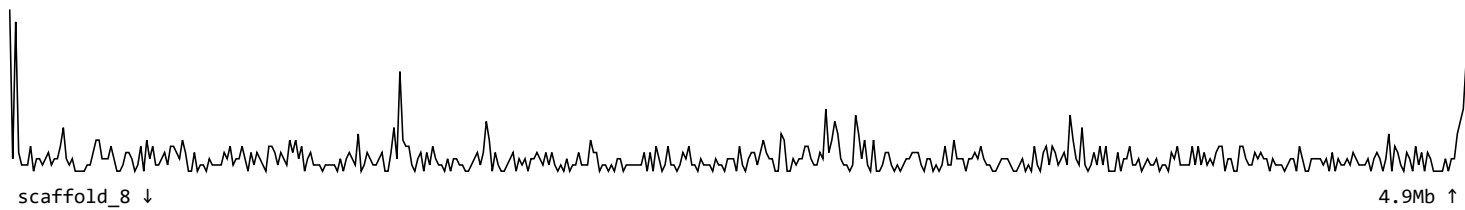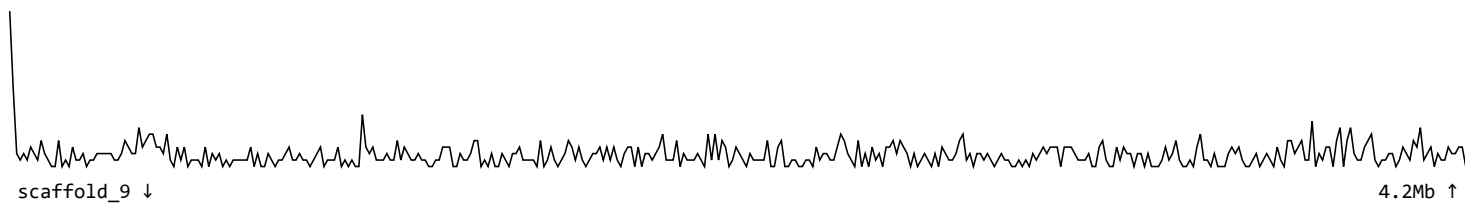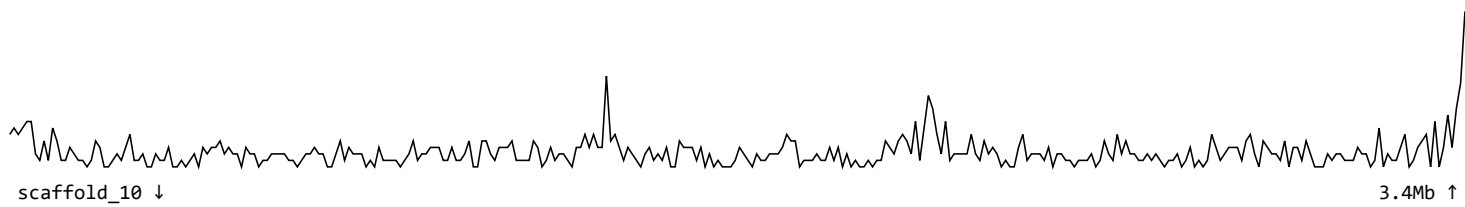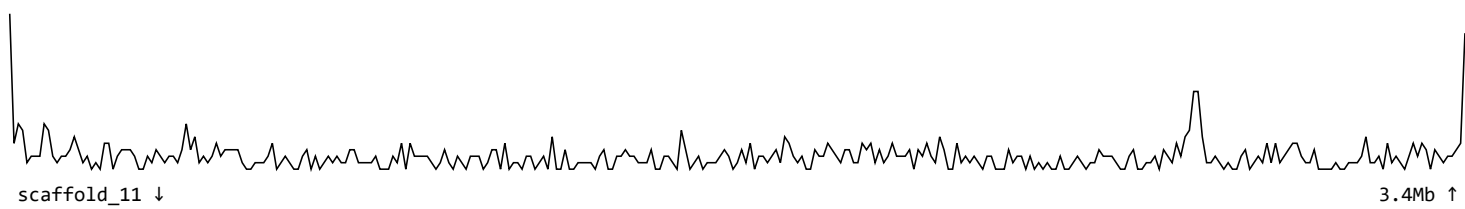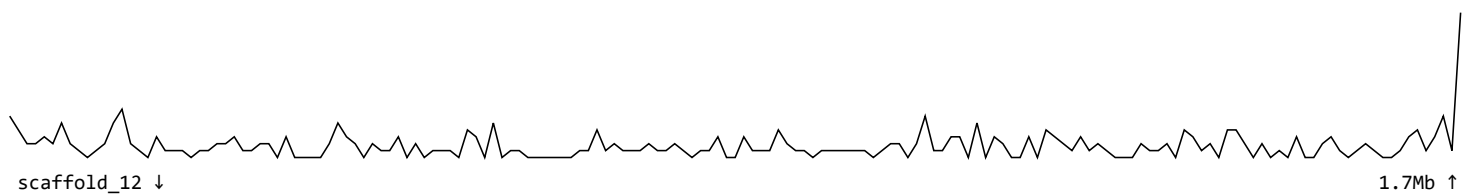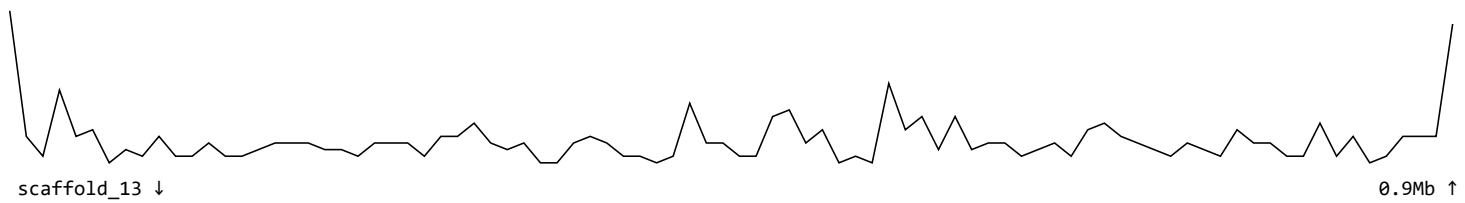

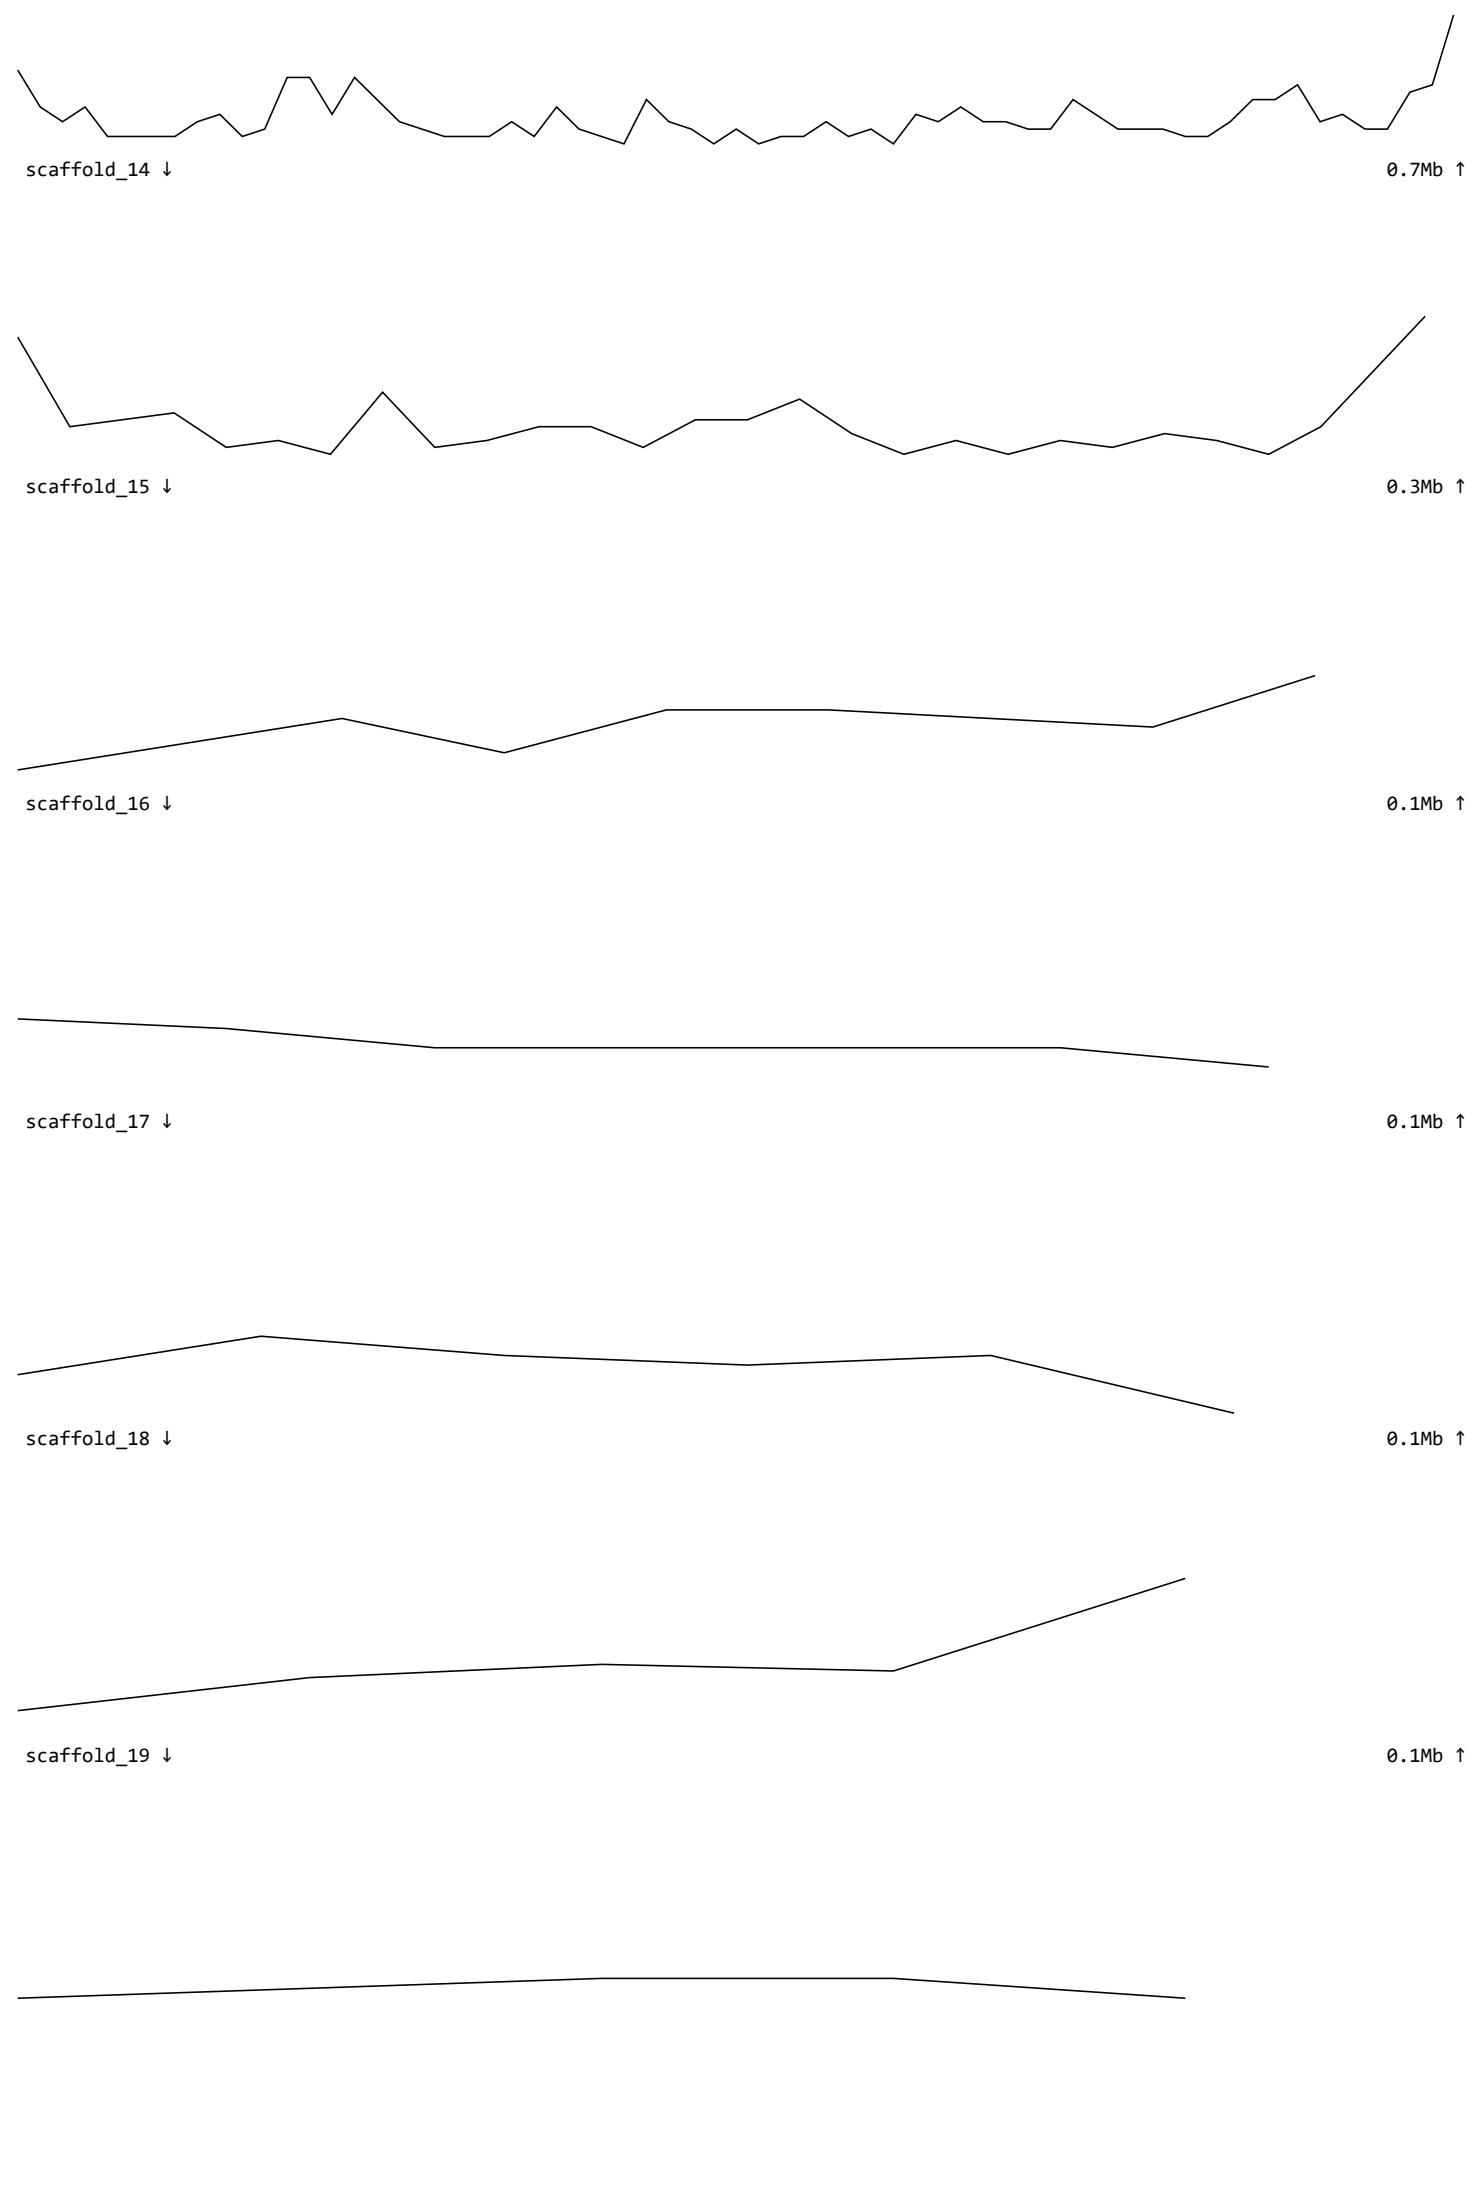

scaffold\_20 ↓

0.1Mb ↑

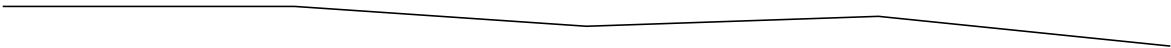

scaffold\_21 ↓

0.1Mb ↑

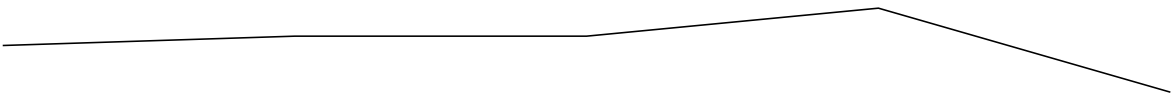

scaffold\_22 ↓

0.1Mb ↑

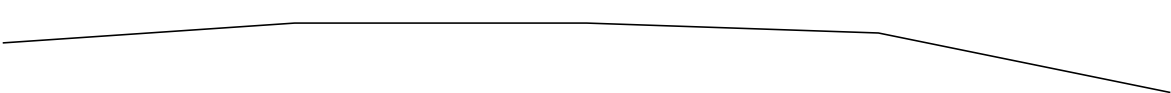

scaffold\_23 ↓

0.1Mb ↑

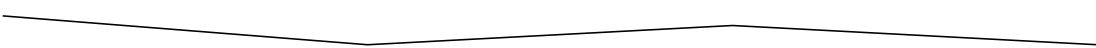

scaffold\_24 ↓

0.0Mb ↑

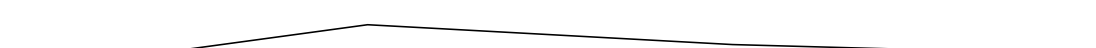

scaffold\_25 ↓

0.0Mb ↑

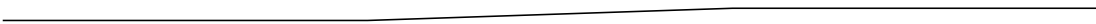

scaffold\_26 ↓

0.0Mb ↑

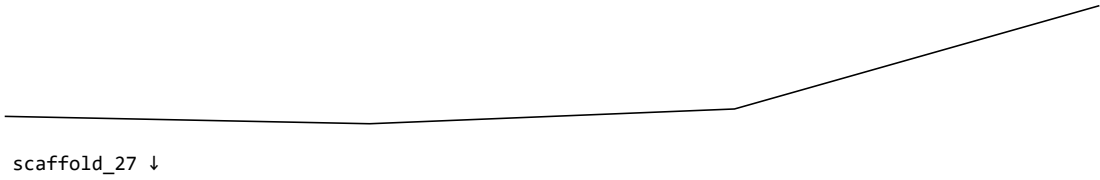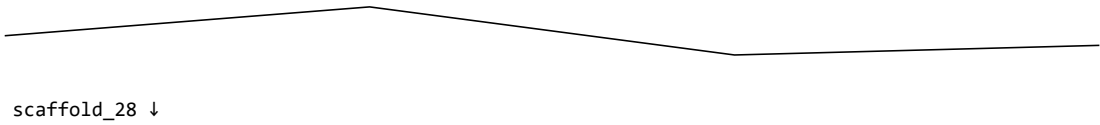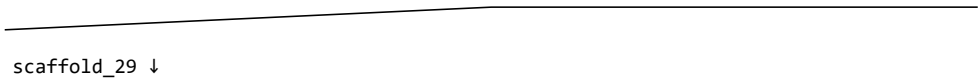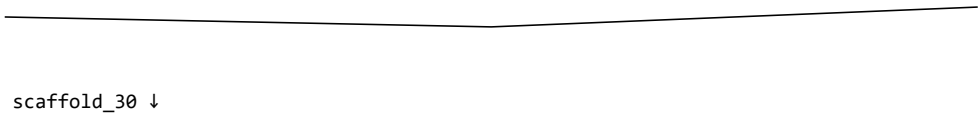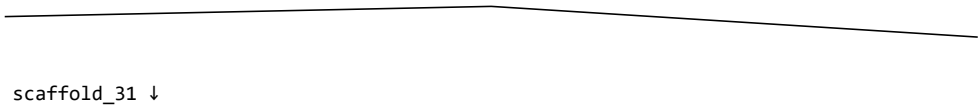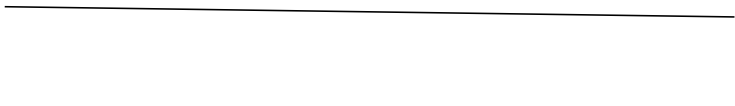

Supplement: s1 [file s1]
