# Supplementary material for: Comparative Genomic Analysis of Colletotrichum lini Strains with Different Virulence on Flax
Source: MDPI journal article supplement (doi:10.3390/jof10010032), 2023-12-31
Supplement: s1 [file s1]

Figure S2. Telomeric repeat (TTAGGG) content along the contig sequences of *Colletotrichum lini* strain #757:  
horizontal axis - coordinate, vertical axis - repeat occurrence (frequency)

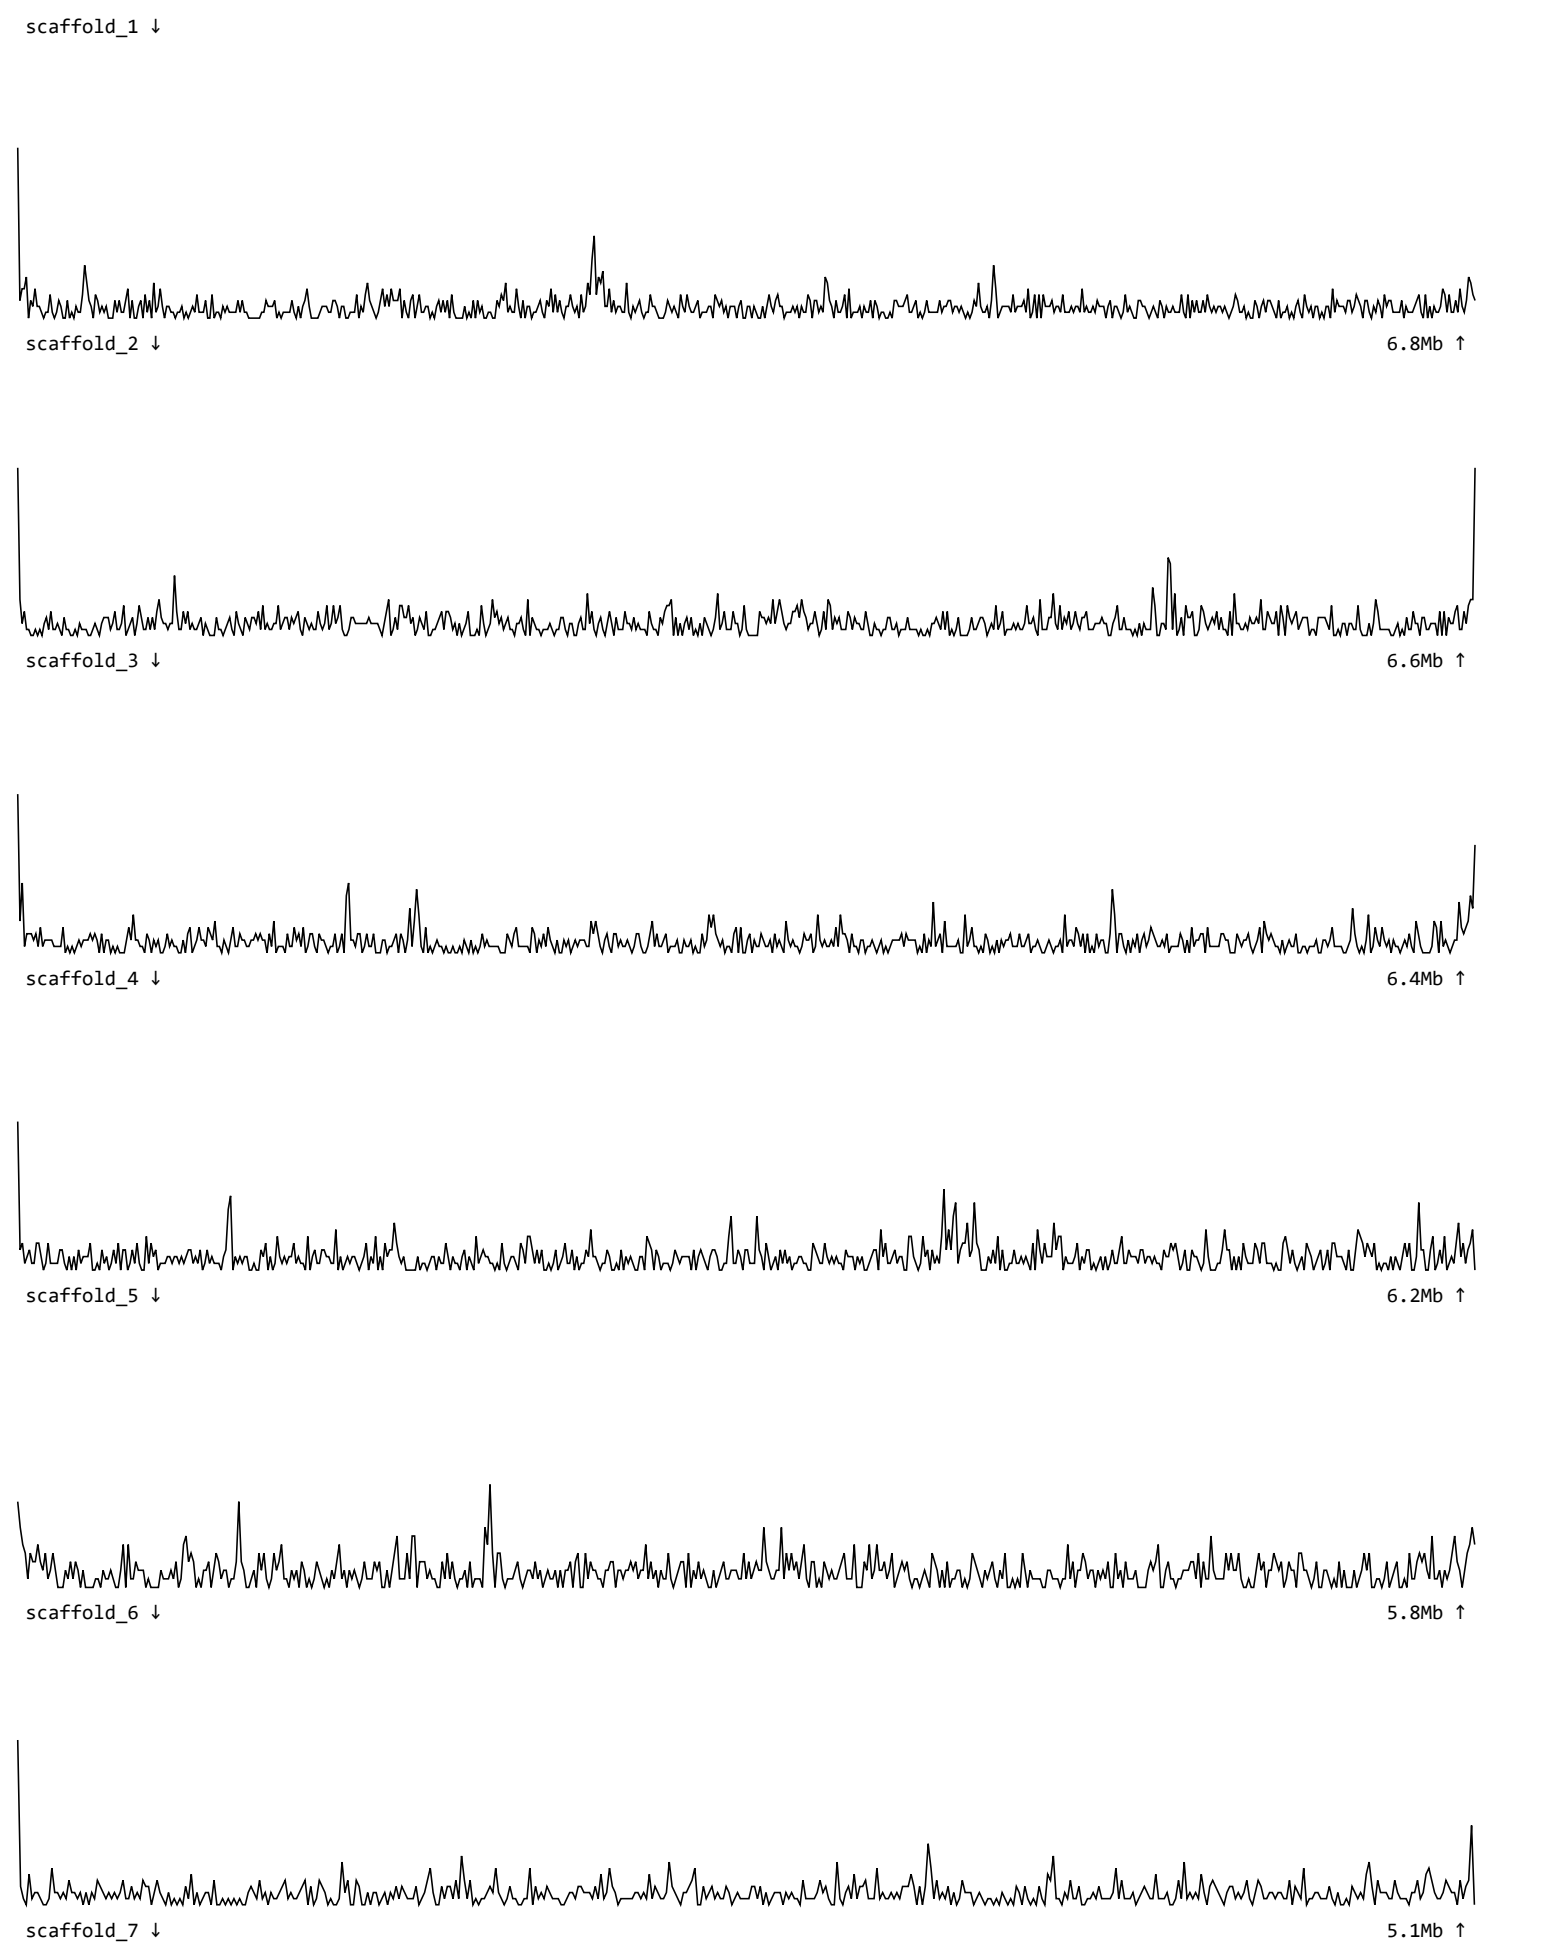

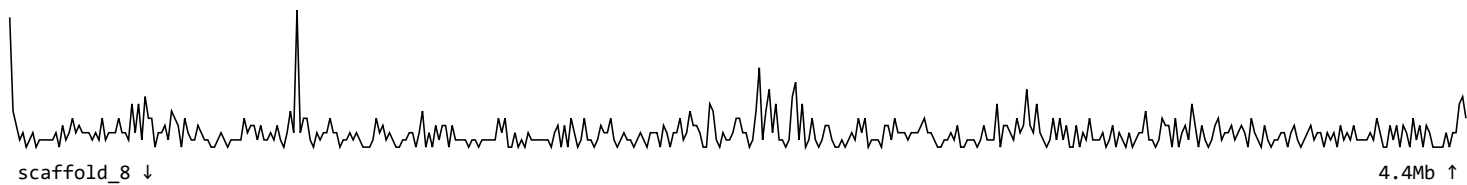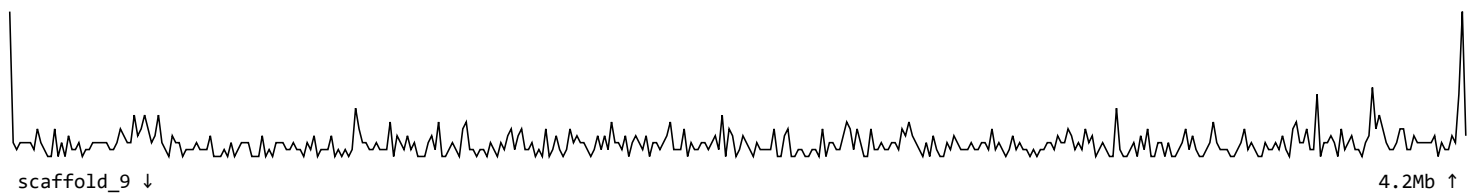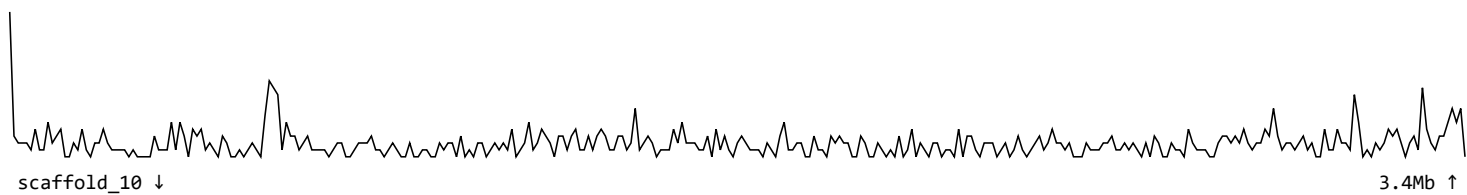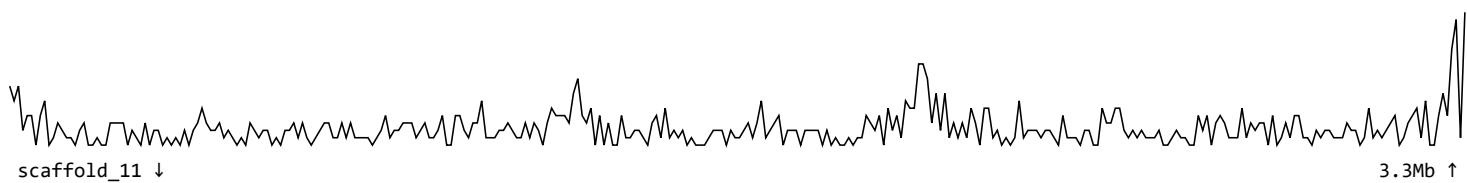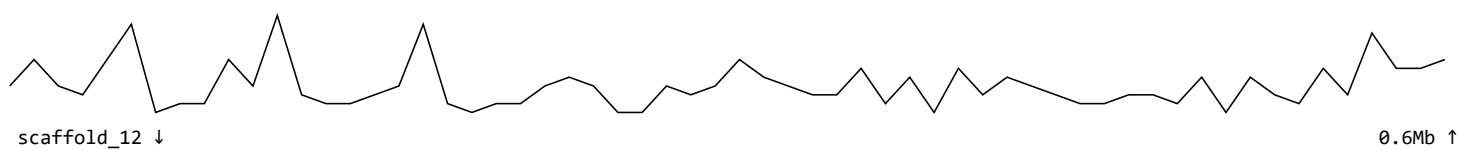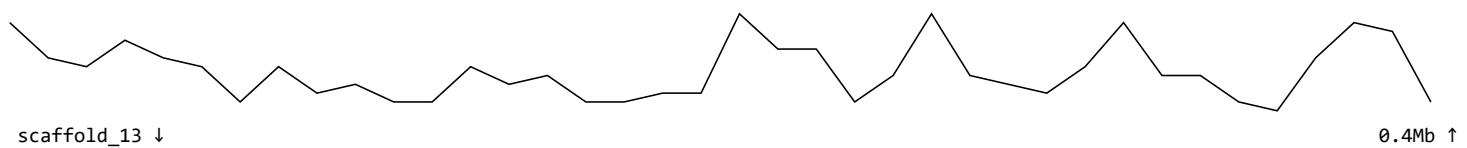

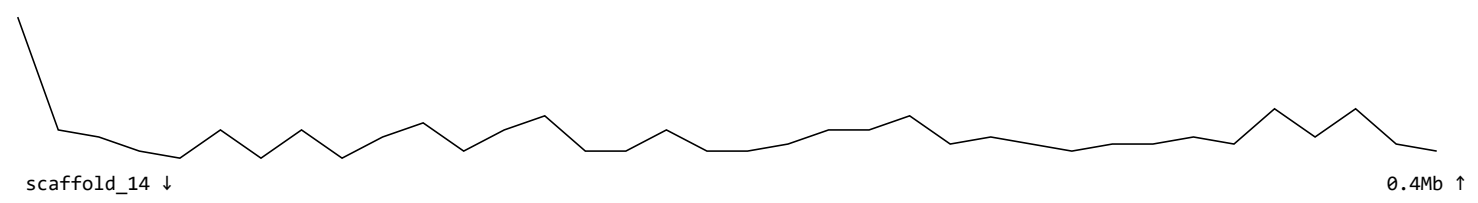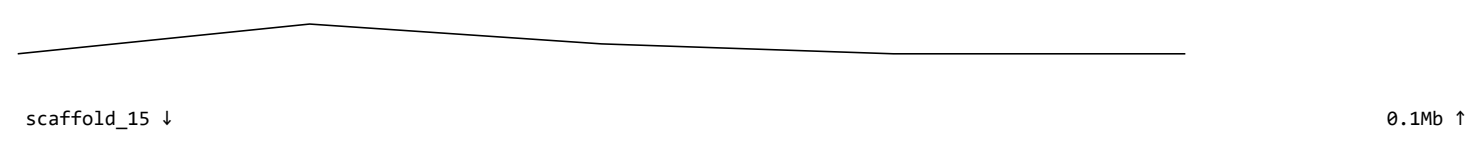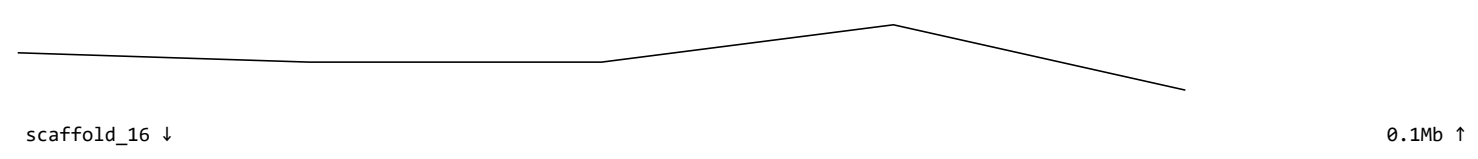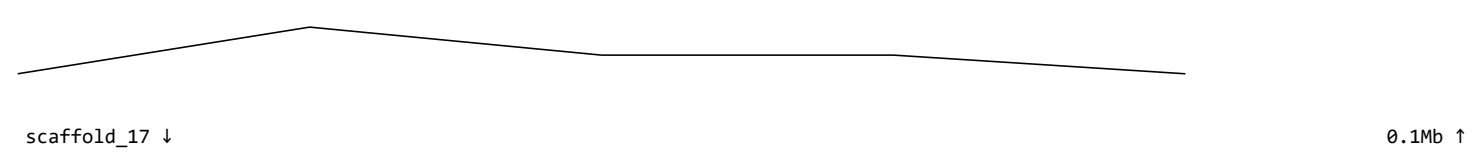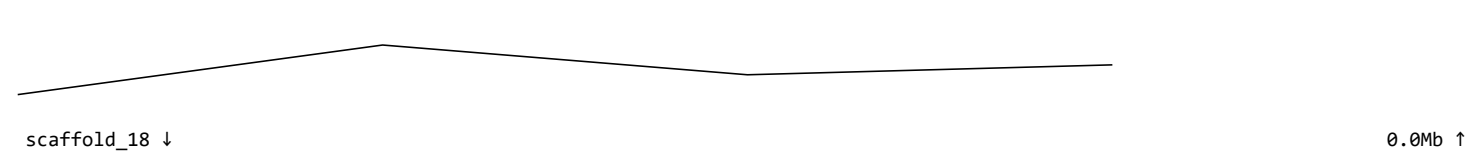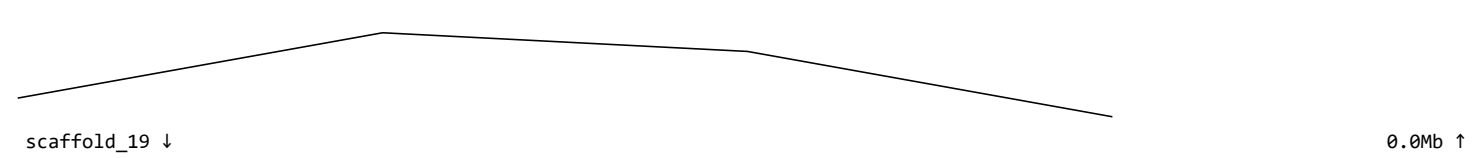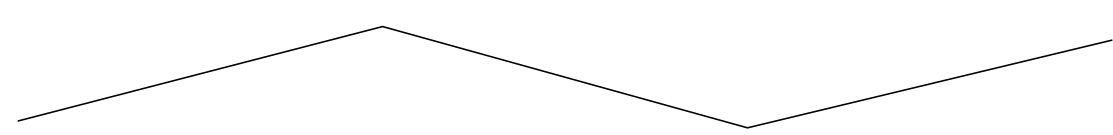

scaffold\_20 ↓

0.0Mb ↑

scaffold\_21 ↓

0.0Mb ↑

scaffold\_22 ↓

0.0Mb ↑

scaffold\_23 ↓

0.0Mb ↑

scaffold\_24 ↓

0.0Mb ↑

scaffold\_25 ↓

0.0Mb ↑

scaffold\_26 ↓

0.0Mb ↑
